# Supplementary figures and images for: Allosteric control of an asymmetric transduction in a G protein-coupled receptor heterodimer
Source: eLife journal article supplement (doi:10.7554/elife.26985), 2017-08-10

Figure 1- figure supplement 1

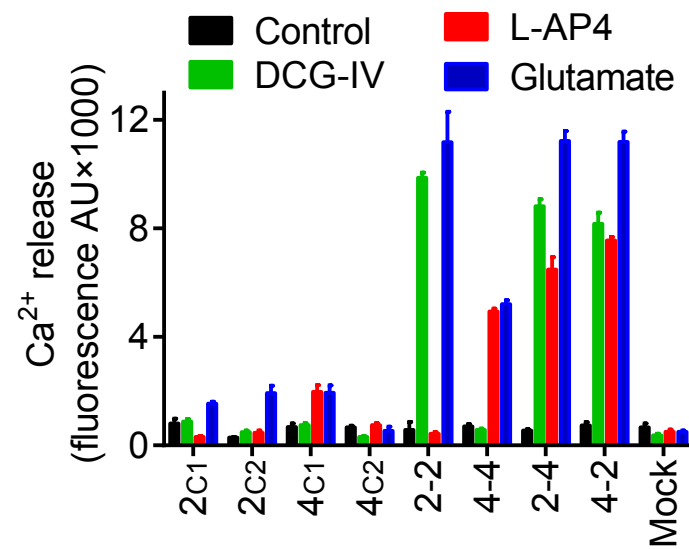

Supplement: supp [file elife-26985-supp-v1.zip]

Figure 6- figure supplement 2

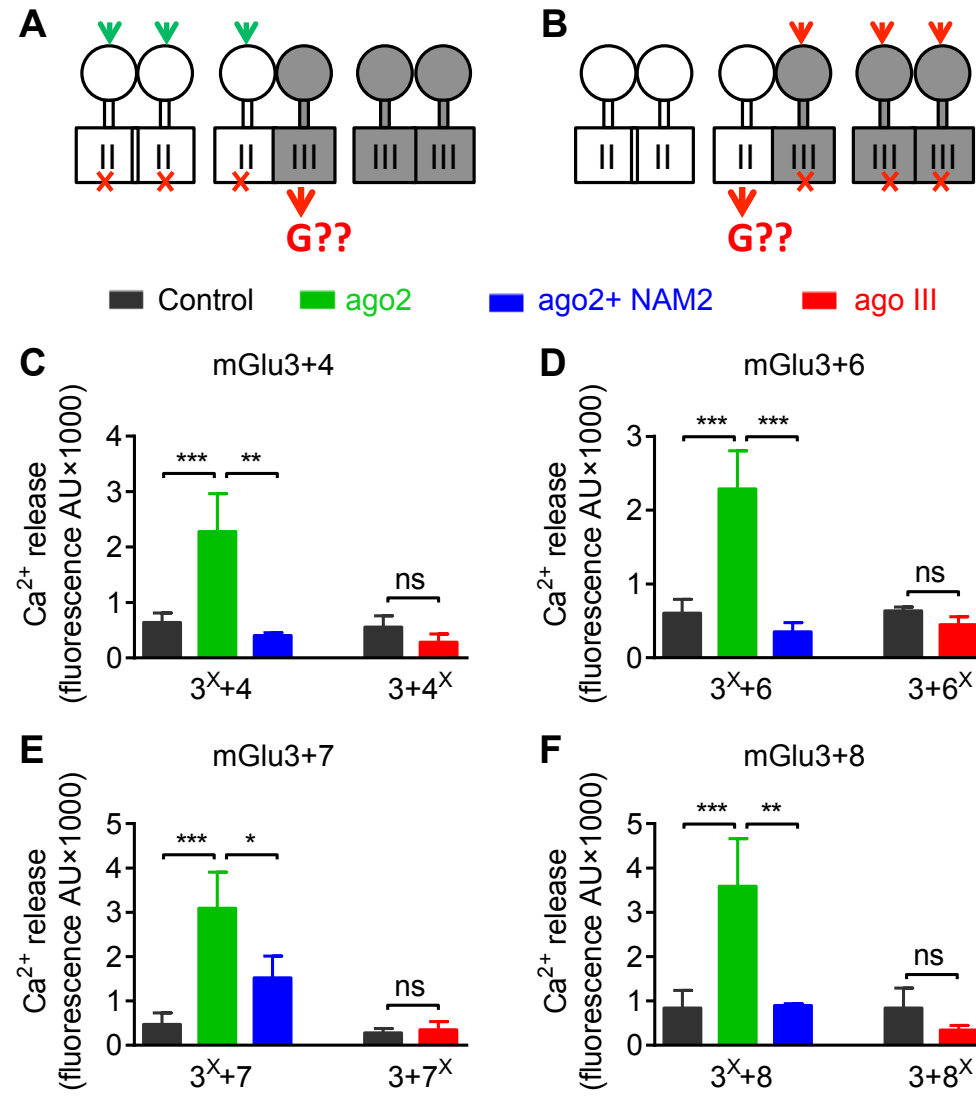

Supplement: supp [file elife-26985-supp-v1.zip]

Figure 2- figure supplement 3

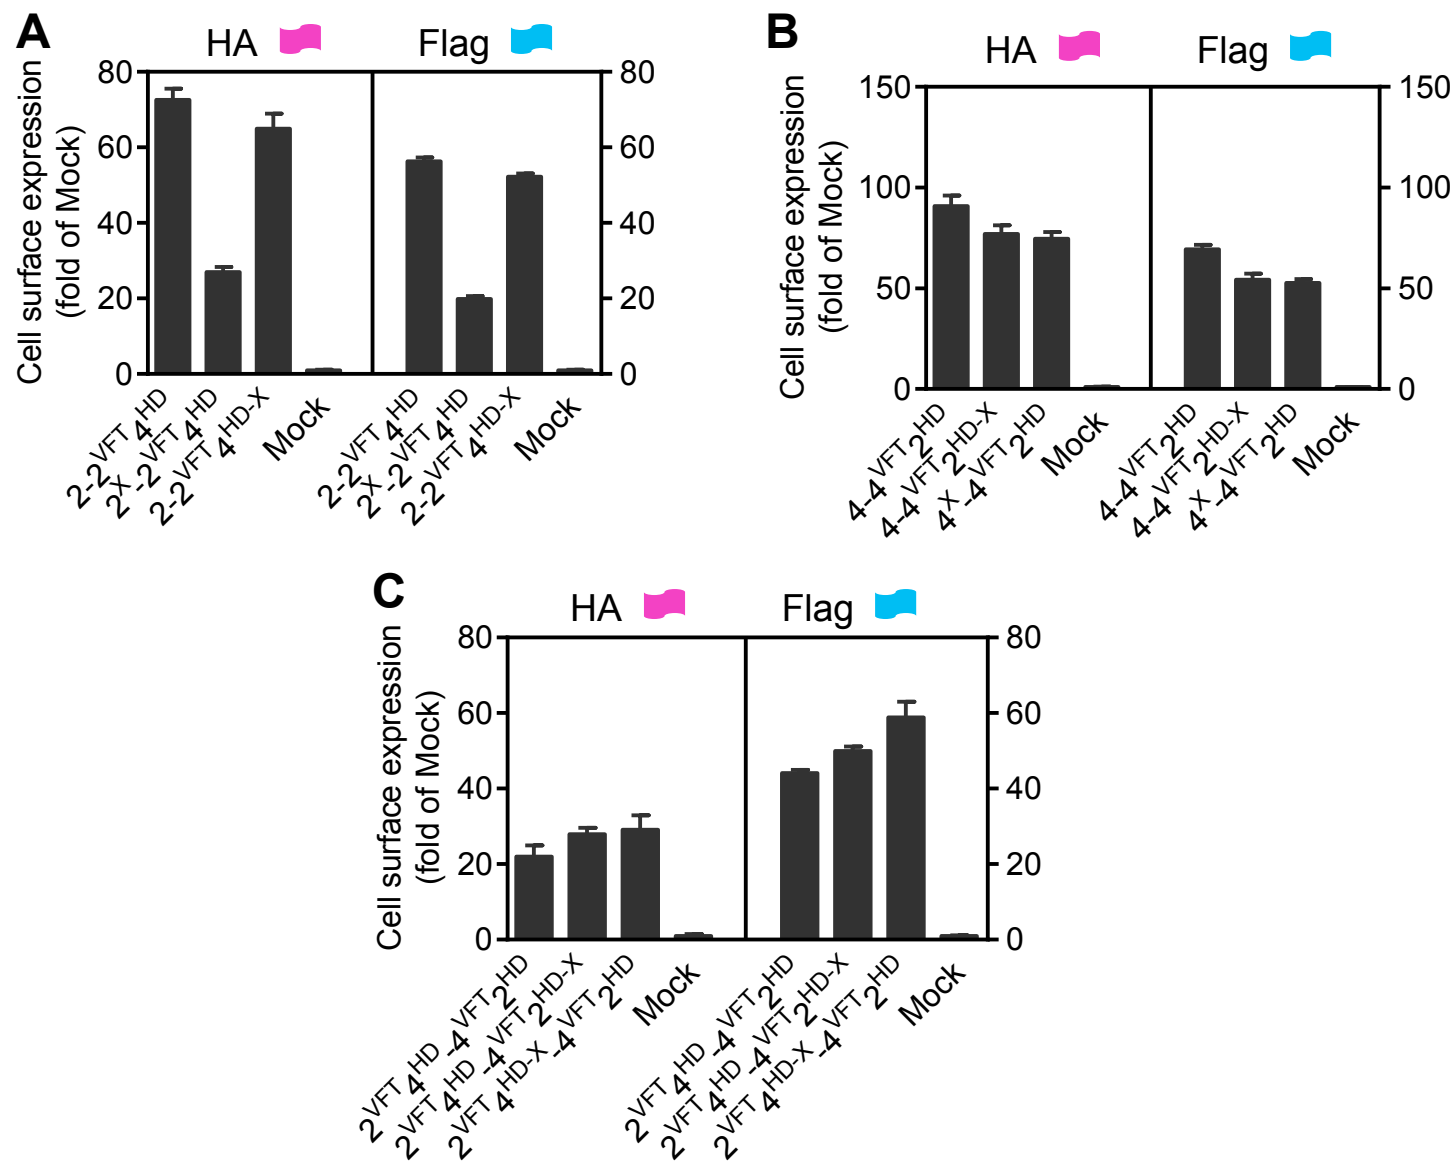

Supplement: supp [file elife-26985-supp-v1.zip]

Figure 3 - figure supplement 1

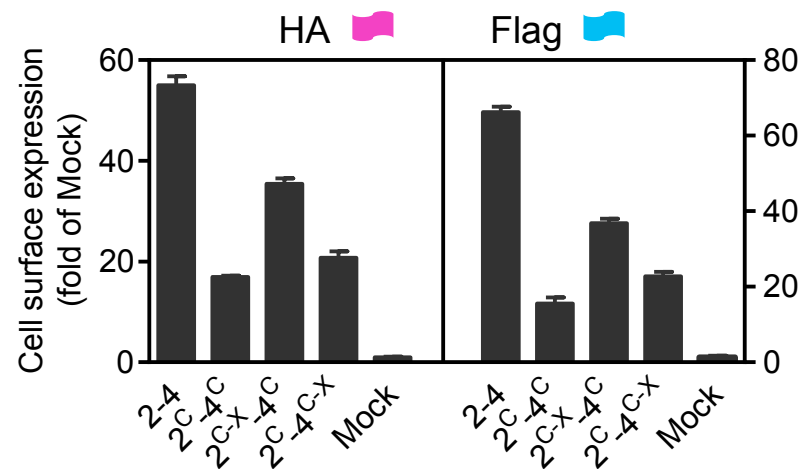

Supplement: supp [file elife-26985-supp-v1.zip]

Figure 2- figure supplement 1

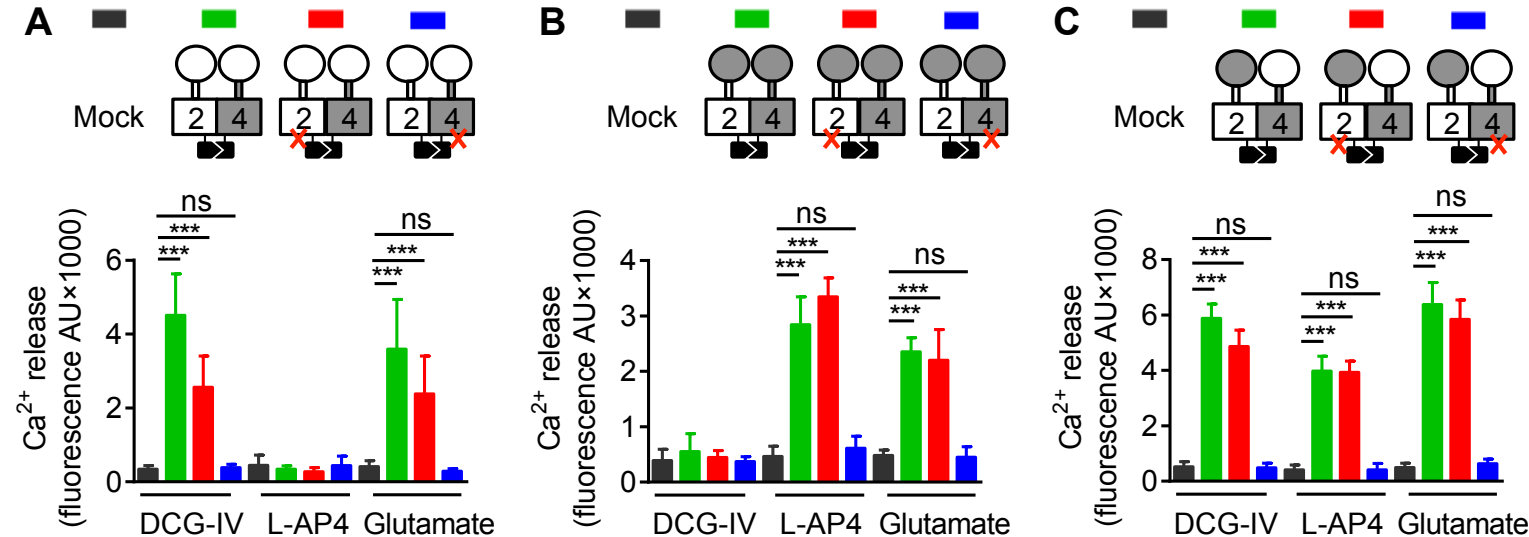

Supplement: supp [file elife-26985-supp-v1.zip]

Figure 6- figure supplement 1

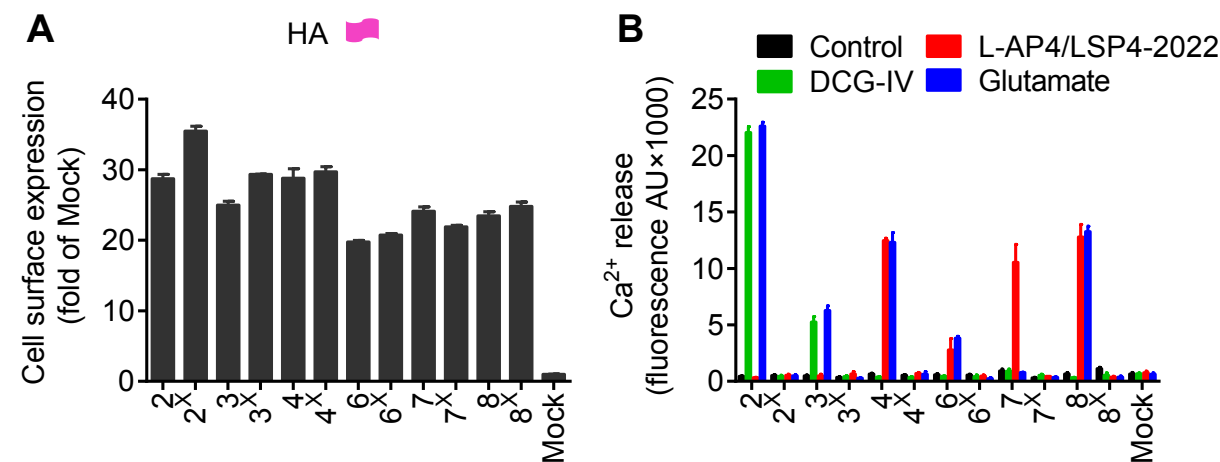

Supplement: supp [file elife-26985-supp-v1.zip]

Figure 1- figure supplement 2

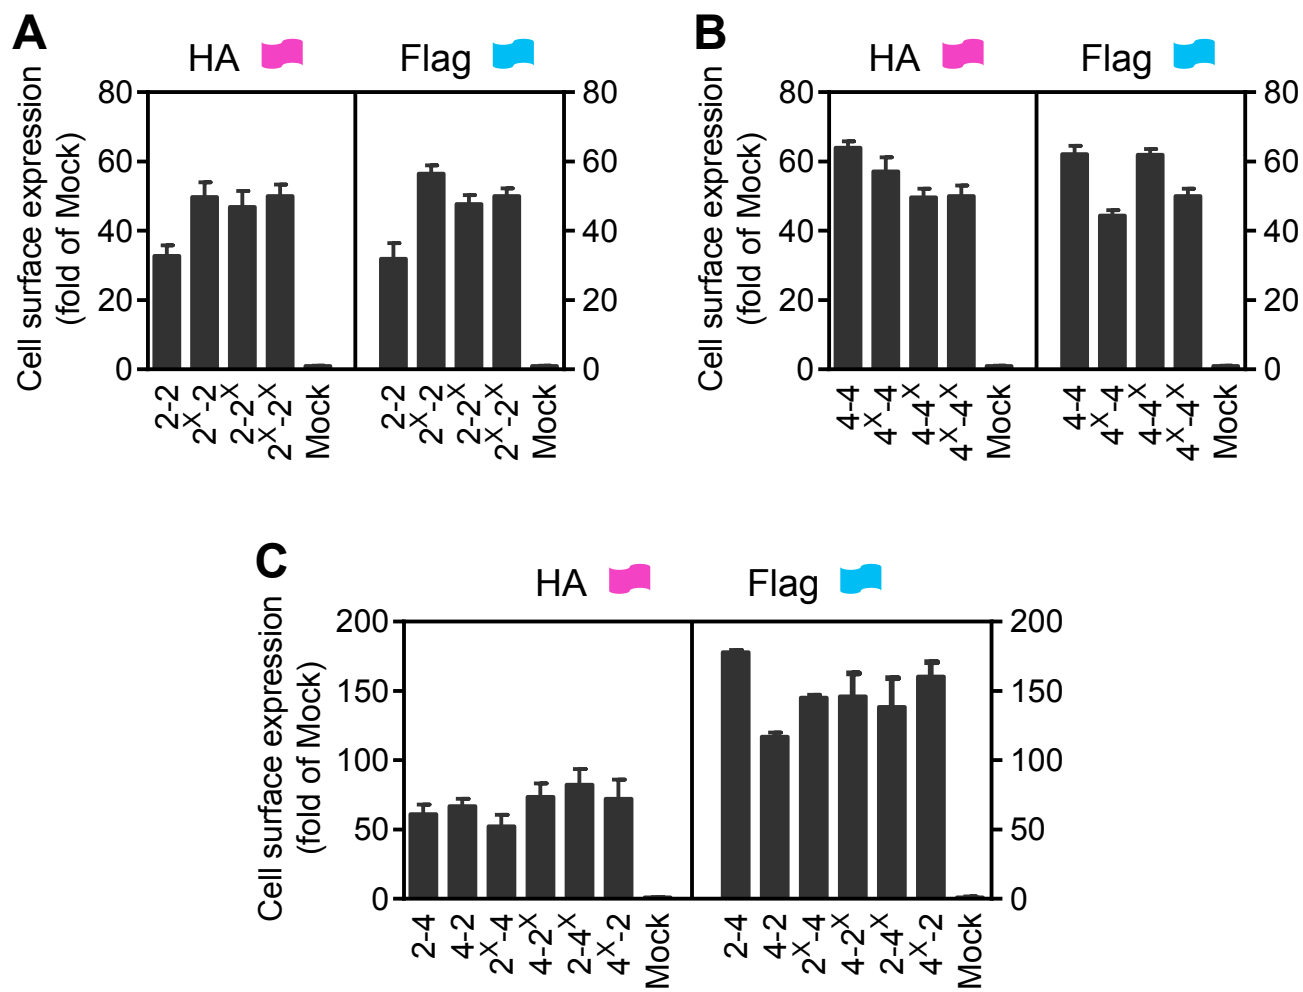

Supplement: supp [file elife-26985-supp-v1.zip]

Figure 2- figure supplement 2

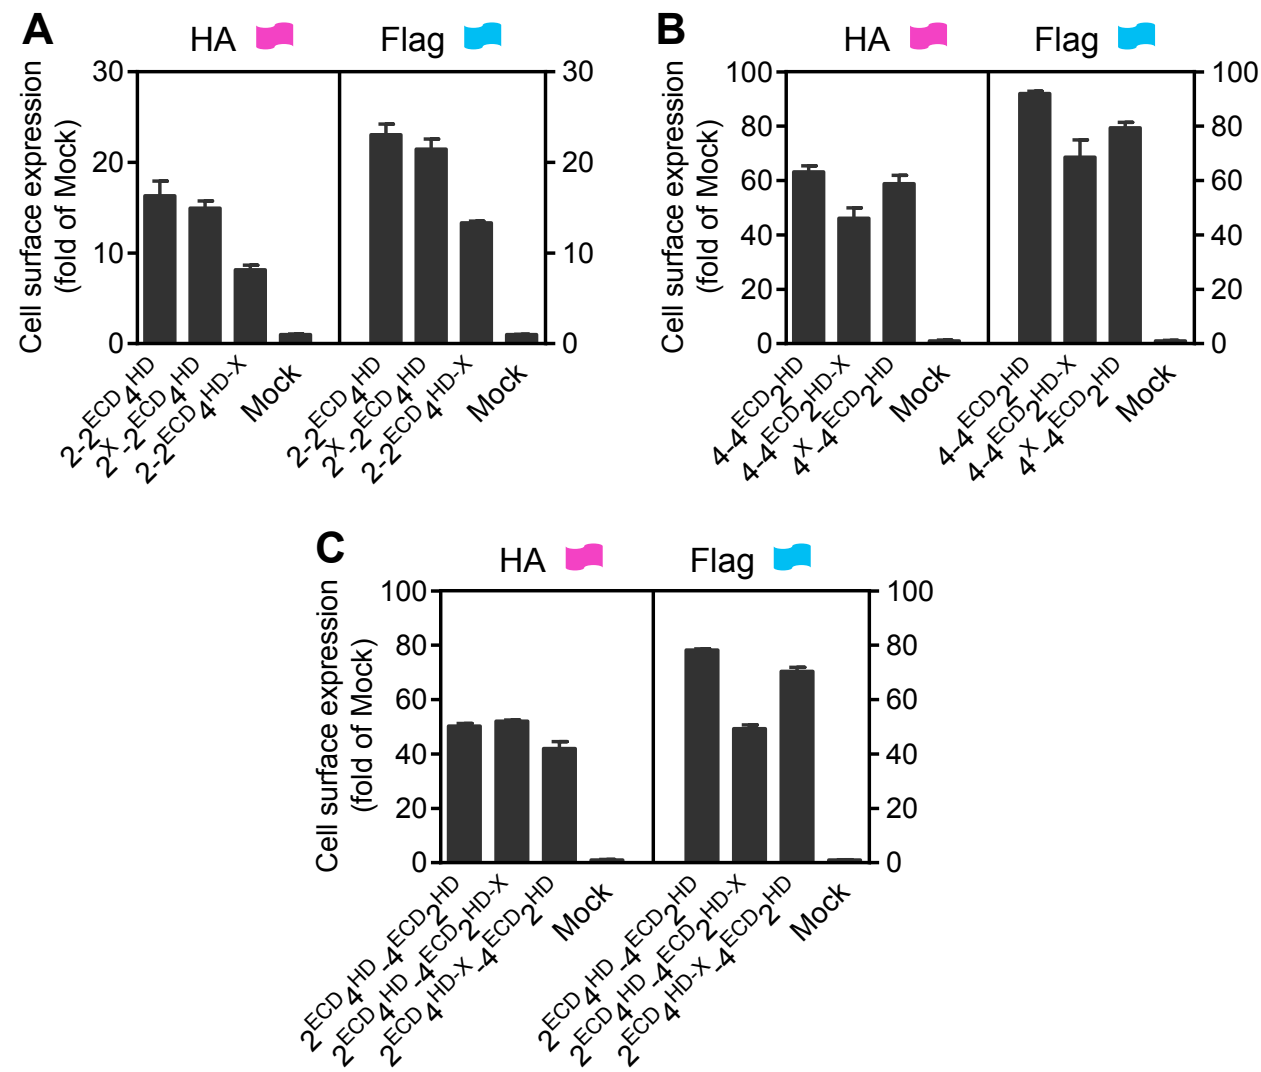

Supplement: supp [file elife-26985-supp-v1.zip]

Figure 1- figure supplement 3

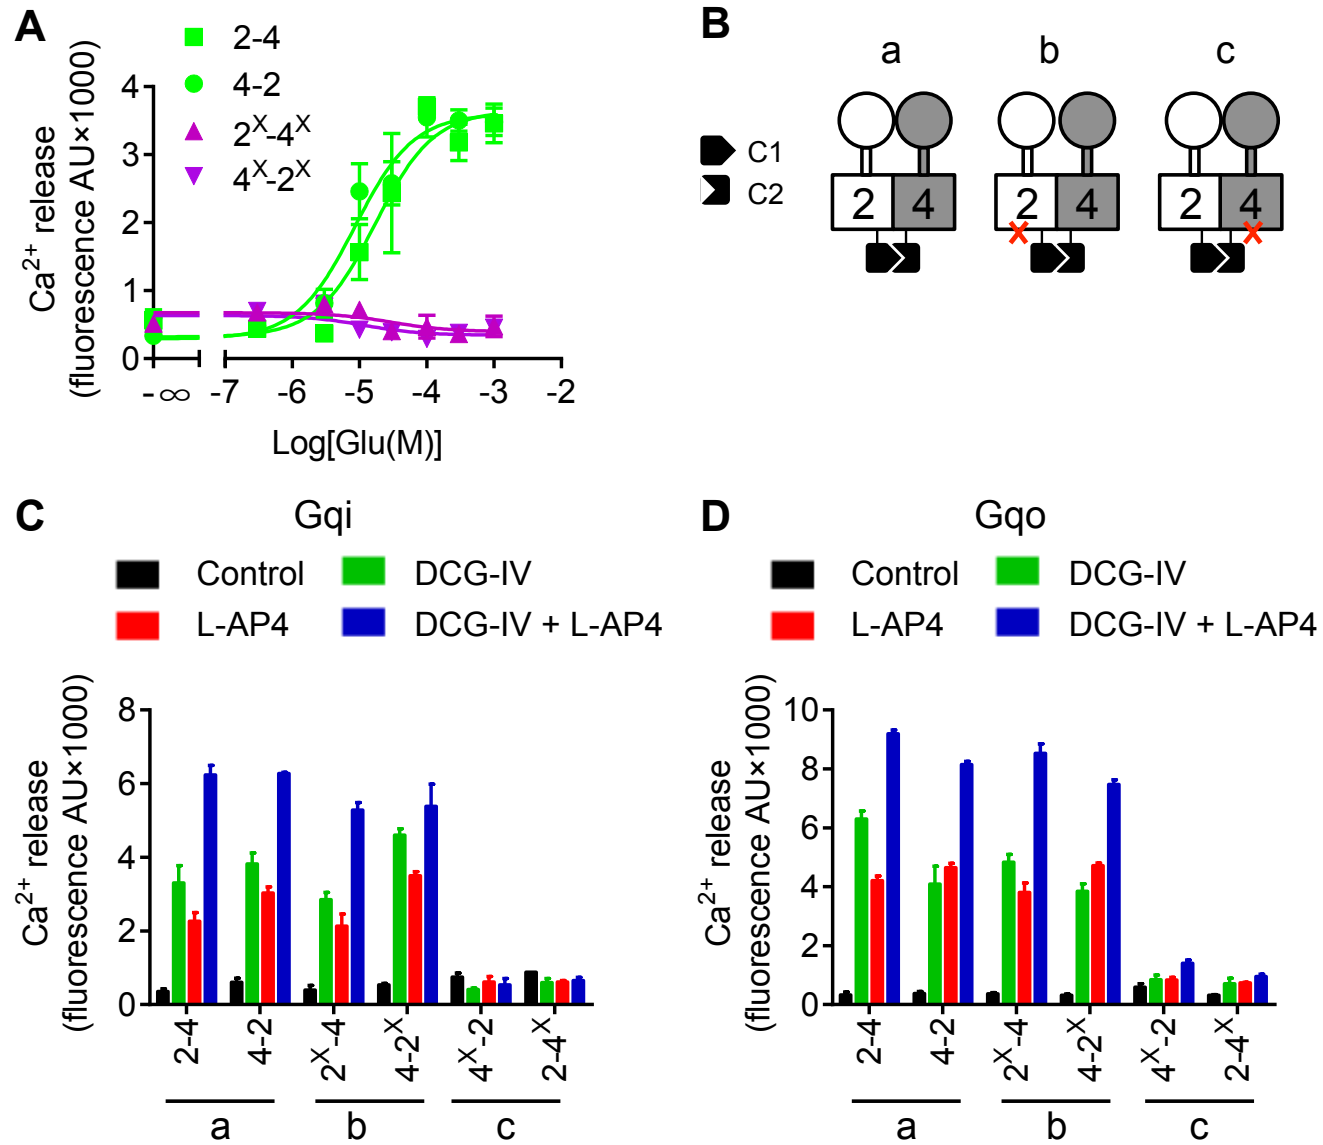

Supplement: supp [file elife-26985-supp-v1.zip]
